# Supplementary material for: Two highly sensitive and selective coumarin-based fluorometric probes for the detection of ClO− and cell imaging
Source: Royal Society of Chemistry journal article supplement (doi:10.1039/c9ay00105k), 2019-01-01
Supplement: c9ay00105k1.pdf [file c9ay00105k1.pdf]

## Highly sensitive and selective of two coumarin-based fluorometric probes for detection of $\text{ClO}^-$ and cell imaging

Lei Jin,<sup>1,2</sup> Xiaoxue Tan,<sup>1</sup> Cong Zhao,<sup>1</sup> Qingming Wang,<sup>1,\*</sup>

<sup>1</sup>School of Pharmacy, Jiangsu Provincial Key Laboratory of Coastal Wetland Bioresources and Environmental Protection, Yancheng Teachers' University, Yancheng, Jiangsu 224051, People's Republic of China;

<sup>2</sup>College of Biotechnology and Pharmaceutical Engineering, Nanjing University of Technology, Nanjing, 210009, People's Republic of China.

---

Corresponding authors. E-mail: [wangqm@yctu.edu.cn](mailto:wangqm@yctu.edu.cn)

Fig.S1. The FI-IR spectrum of **BCO**

Fig.S2. The FI-IR spectrum of **BETC**

Fig.S3. ESI-MS spectrum of **BCO**

Fig.S4. ESI-MS spectrum of **BETC**

Fig.S5. <sup>1</sup>H-NMR spectrum of **BCO**

Fig.S6. <sup>13</sup>C-NMR spectrum of **BCO**

Fig.S7. <sup>1</sup>H-NMR spectrum of **BETC**

Fig.S8. <sup>13</sup>C-NMR spectrum of **BETC**

Fig S9. Fluorescent emissions spectra of **BCO** & **BETC** (1.0  $\mu\text{M}$ ) in the presence of  $\text{ClO}^-$ . (A) for **BCO**; (B) for **BETC**.

Fig S10. (a) Fluorescence emission spectrum for **BCO** (1.0  $\mu\text{M}$ ) and different metal ions ( $\lambda_{\text{ex}} = 372 \text{ nm}$ ). Inset: The visible fluorescence changes upon Uv irradiation. (b) Fluorescence emission spectrum for **BETC** (1.0  $\mu\text{M}$ ) and different metal ions ( $\lambda_{\text{ex}} = 350 \text{ nm}$ ). Inset: The visible fluorescence changes upon Uv irradiation.

Fig S11. ESI mass spectra of **BETC** upon addition of excess  $\text{ClO}^-$ .

Fig S12. <sup>1</sup>H-NMR spectrum of **NOA**

Fig S13. <sup>13</sup>C-NMR spectrum of **NOA**

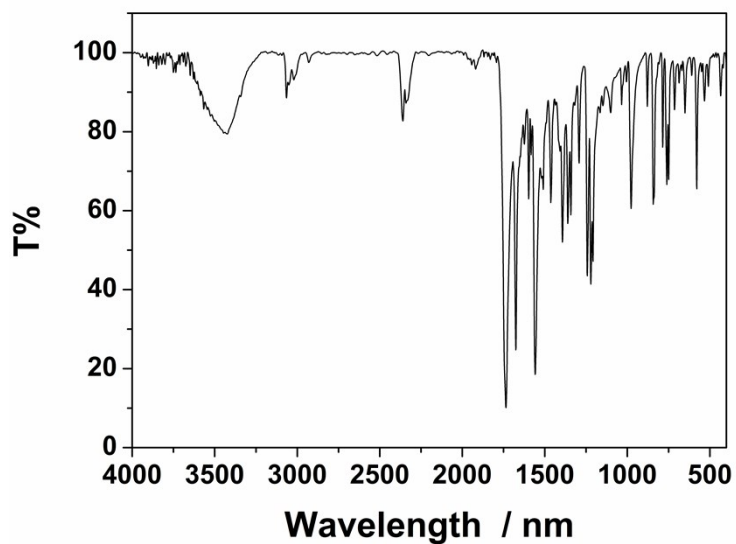

Fig.S1. The FI-IR spectrum of **BCO**

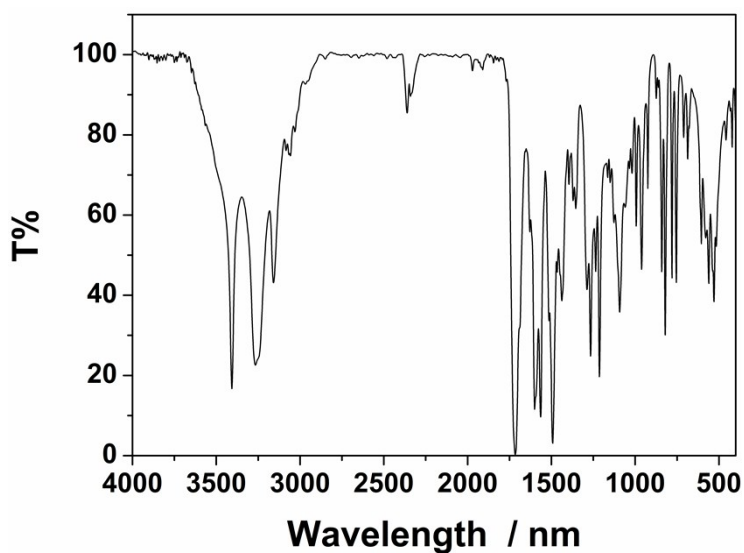

Fig.S2. The FI-IR spectrum of **BETC**

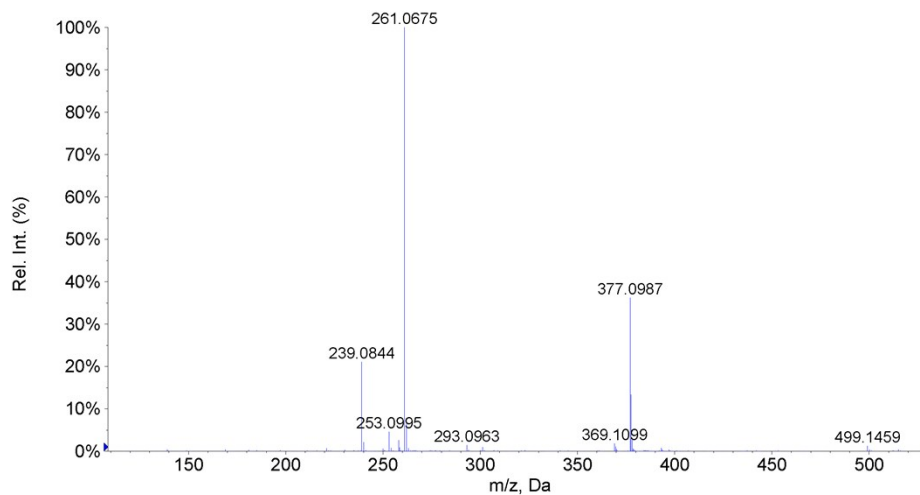

Fig.S3. ESI-MS spectrum of **BCO**

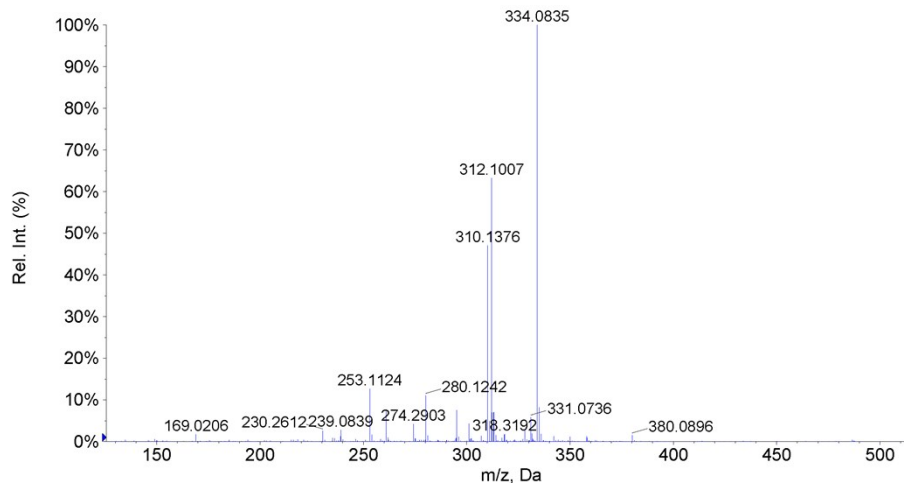

Fig.S4. ESI-MS spectrum of BETC

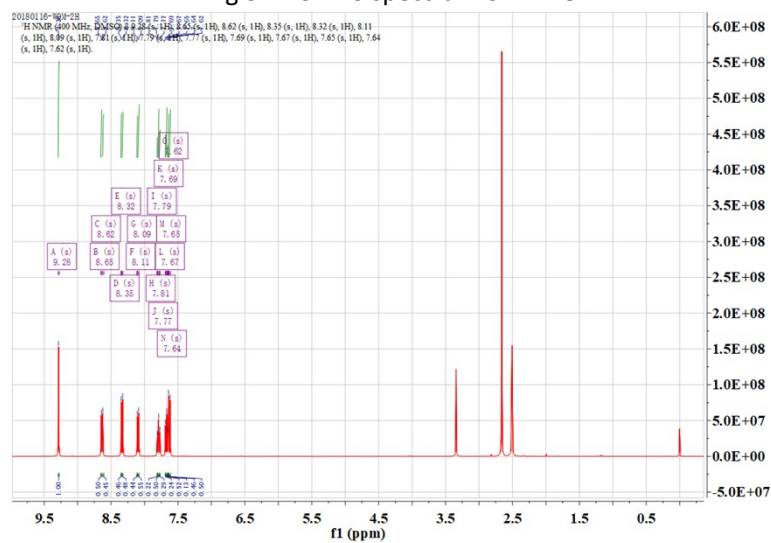

Fig.S5. <sup>1</sup>H-NMR spectrum of BCO

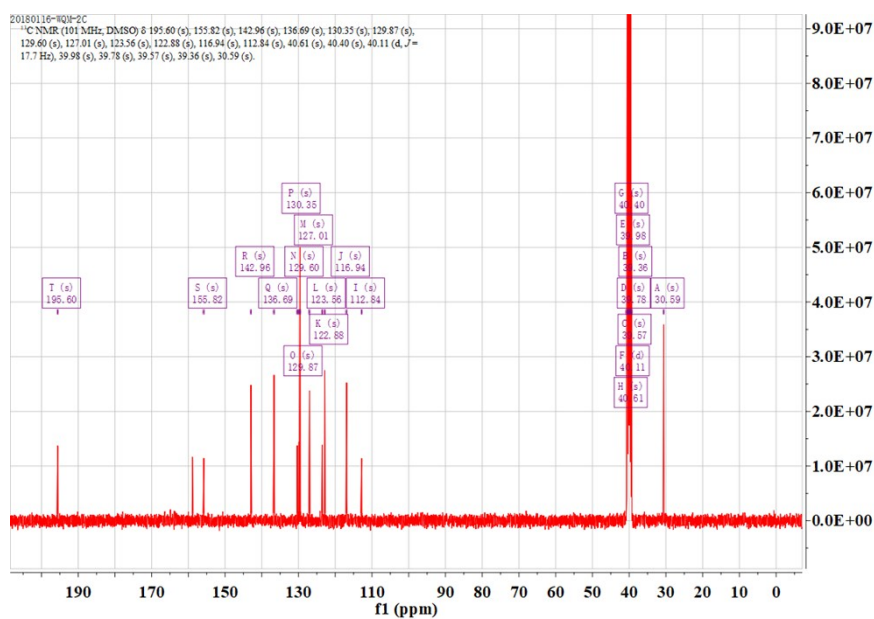

Fig.S6. <sup>13</sup>C-NMR spectrum of BCO



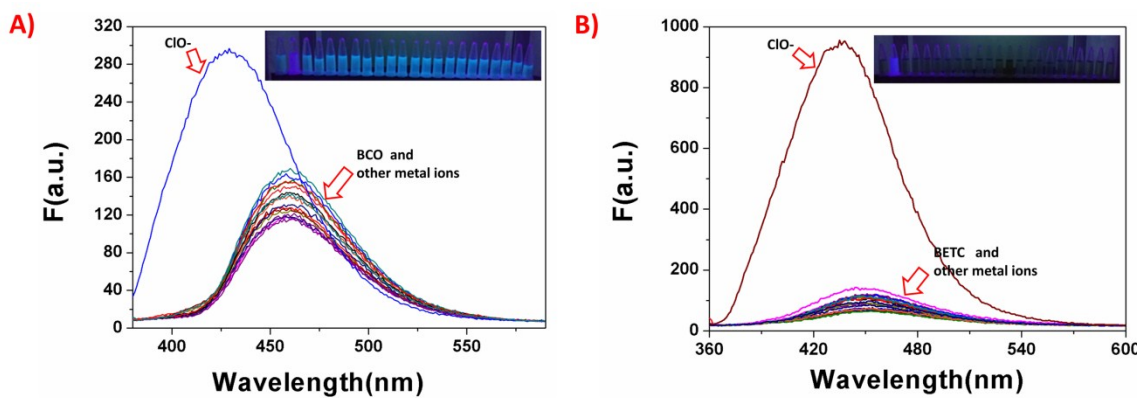

Fig S10. (a) Fluorescence emission spectrum for **BCO** (1.0 μM) and different metal ions ( $\lambda_{\text{ex}} = 372 \text{ nm}$ ). Inset: The visible fluorescence changes upon UV irradiation. (b) Fluorescence emission spectrum for **BETC** (1.0 μM) and different metal ions ( $\lambda_{\text{ex}} = 350 \text{ nm}$ ). Inset: The visible fluorescence changes upon UV irradiation.

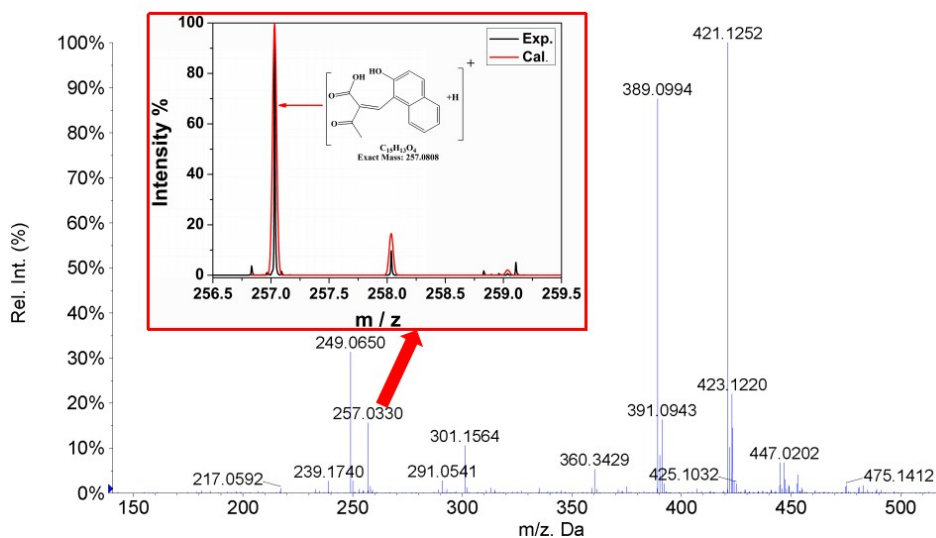

Fig S11. ESI mass spectra of **BETC** upon addition of excess ClO<sup>-</sup>.

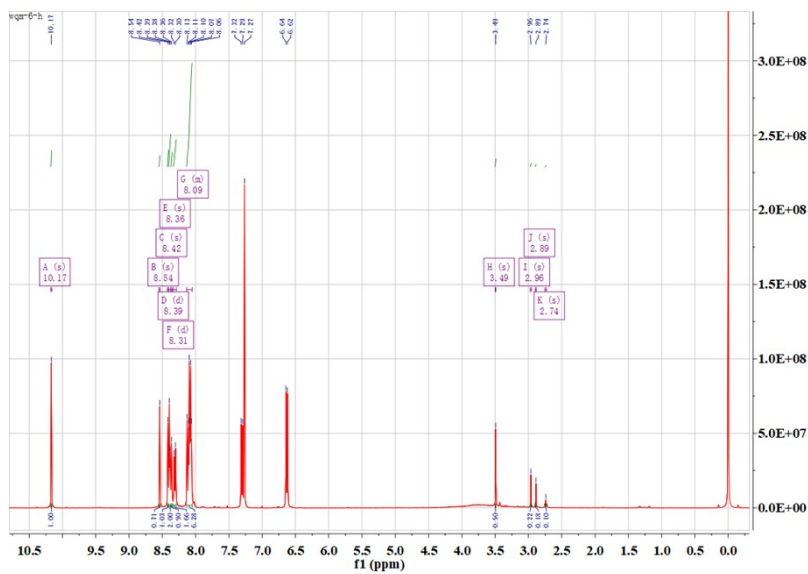

Fig S12. <sup>1</sup>H-NMR spectrum of NOA

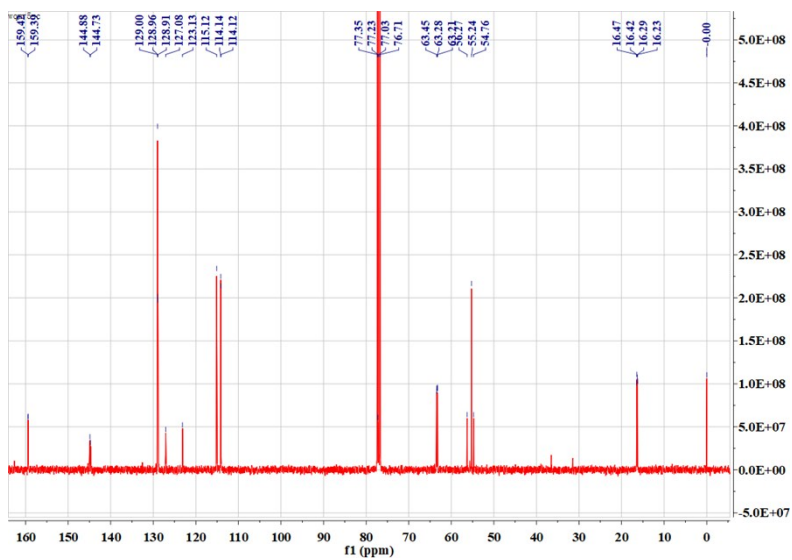

Fig S13. <sup>13</sup>C-NMR spectrum of NOA

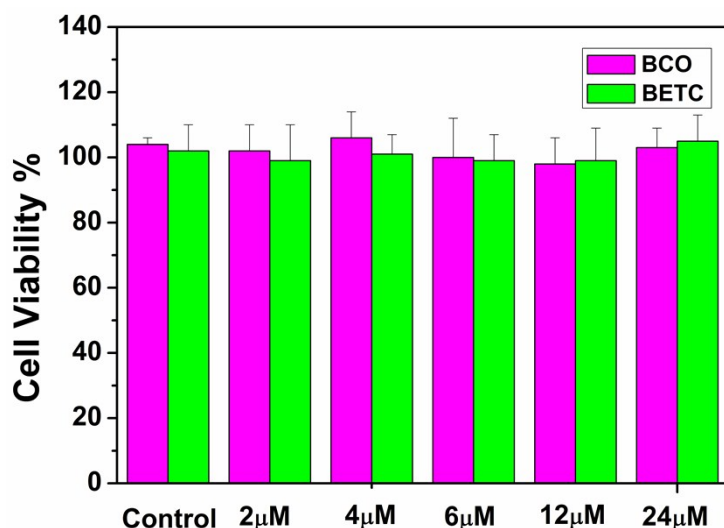

**Fig. S14.** The cell viability incubated with **BCO** & **BETC** at various concentrations ( 0, 2, 4, 6, 12 and 24  $\mu\text{M}$ ). The experiments were repeated three times and the data were shown as mean value( $\pm$ SD).

Table S1 Compared with other reported methods

| LOD / nM | Linear range/ $\mu\text{M}$ | Response Time/S | Application          | Reaction media               | Reference |
|----------|-----------------------------|-----------------|----------------------|------------------------------|-----------|
| 5.86     | 0-40                        | 135             | Living cells imaging | Water                        | [22]      |
| 8.2      | 0-100                       | 1200            | Living cells imaging | Water                        | [23]      |
| —        | 0.5-5                       | —               | Living cells imaging | Methanol:PBS (5:5,v/v) pH7.4 | [25]      |
| 0.027    | 0-0.003                     | 3               | Living cells imaging | PBS pH 7.4                   | [27]      |
| 0.43     | 1-10                        | 30              | Living cells imaging | EtOH:PBS (1:9,v/v) pH 7      | [30]      |
| —        | 1-7                         | 60              | Living cells imaging | PBS:DMSO (1:9,v/v) pH 7.4    | [32]      |
| 77.82    | 0-200.96                    | 16              | Living cells imaging | PBS pH 7.4                   | [36]      |
| 182      | 0-25                        | 120             | Living cells imaging | EtOH:PBS (3:7,v/v) pH 7.4    | [43]      |

---

|     |      |     |                         |                                                            |           |
|-----|------|-----|-------------------------|------------------------------------------------------------|-----------|
| 9.6 | 0-55 | 5   | Living cells<br>imaging | H <sub>2</sub> O:CH <sub>3</sub> CN<br>(4:1,v/v)<br>pH 7.4 | [46]      |
| 7.0 | 1-10 | 60  | Living cells<br>imaging | EtOH:PBS<br>(1:9,v/v)<br>pH 7.3                            | [47]      |
| 210 | 0-18 | 120 | Living cells<br>imaging | EtOH:PBS<br>(1:9,v/v)<br>pH 7.4                            | [45]      |
| 154 | 0-70 |     | Living cells<br>imaging |                                                            | This work |
| 32  | 0-20 |     | Living cells<br>imaging |                                                            | This work |

---
